# Supplementary material for: Heavy metal cation and anion sensing studies of N-(2-hydroxybenzyl)-isopropylamine surface functionalized AgNPs
Source: Royal Society of Chemistry journal article supplement (doi:10.1039/c4nj01740d), 2014-12-01
Supplement: c4nj01740d1.pdf [file c4nj01740d1.pdf]

## Heavy metal cations and anions sensing studies of N-(2-hydroxybenzyl)- isopropylamine surface functionalized AgNPs

V. Vinod Kumar and Savarimuthu Philip Anthony\*

School of Chemical and Biotechnology, SASTRA University, Thanjavur-613402,

Tamil Nadu, INDIA, Fax: +914362264120; Tel: +914362264101;

E-mail: [philip@biotech.sastra.edu](mailto:philip@biotech.sastra.edu)

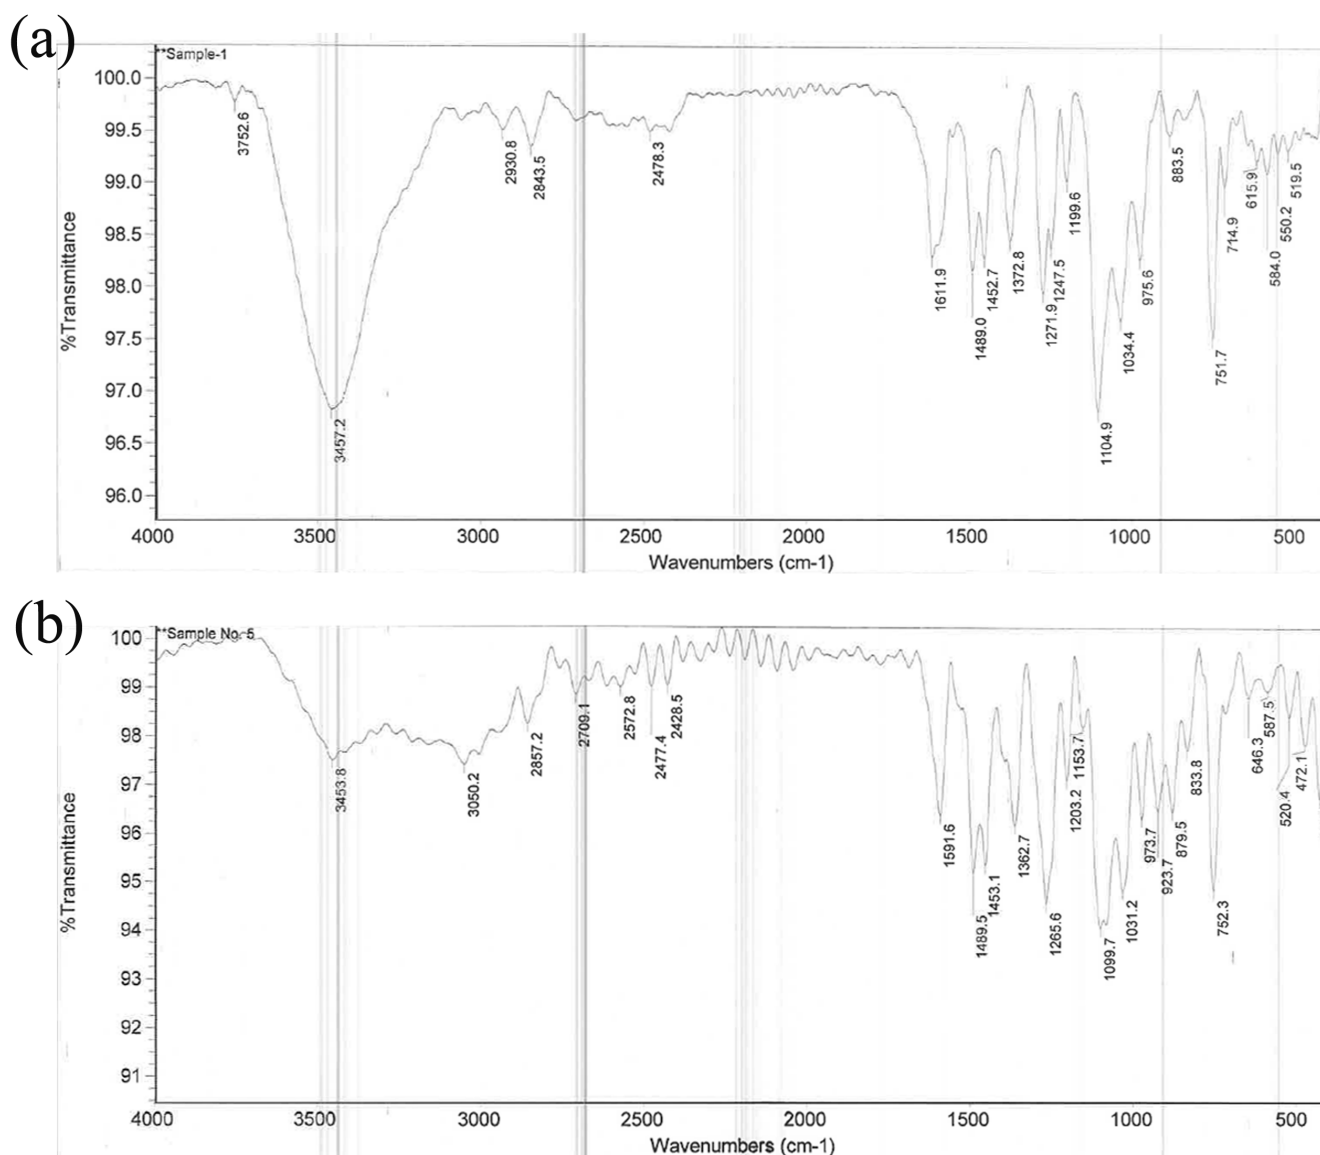

Fig. S1. FT-IR spectra 1 (a) and 1-AgNPs (b).

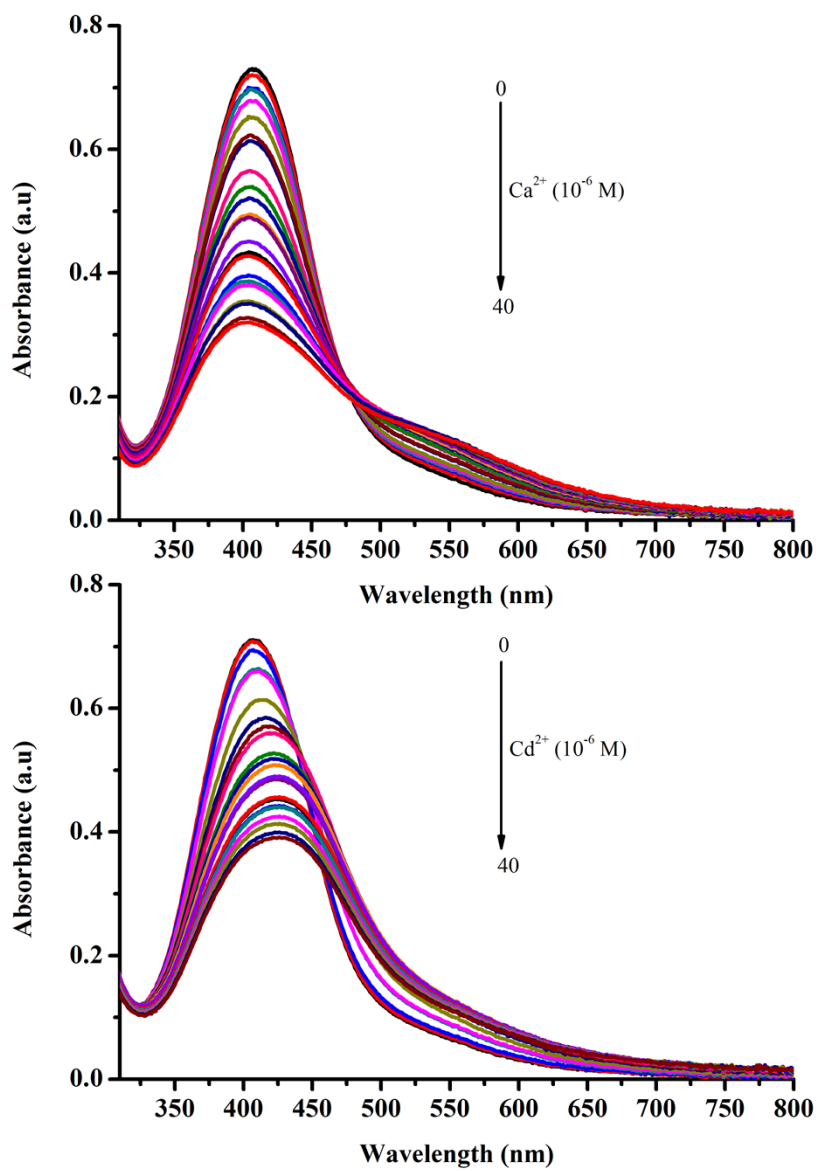

Fig. S2. Change of 1-AgNPs absorbance with  $\text{Ca}^{2+}$  (a) and  $\text{Cd}^{2+}$  concentration.

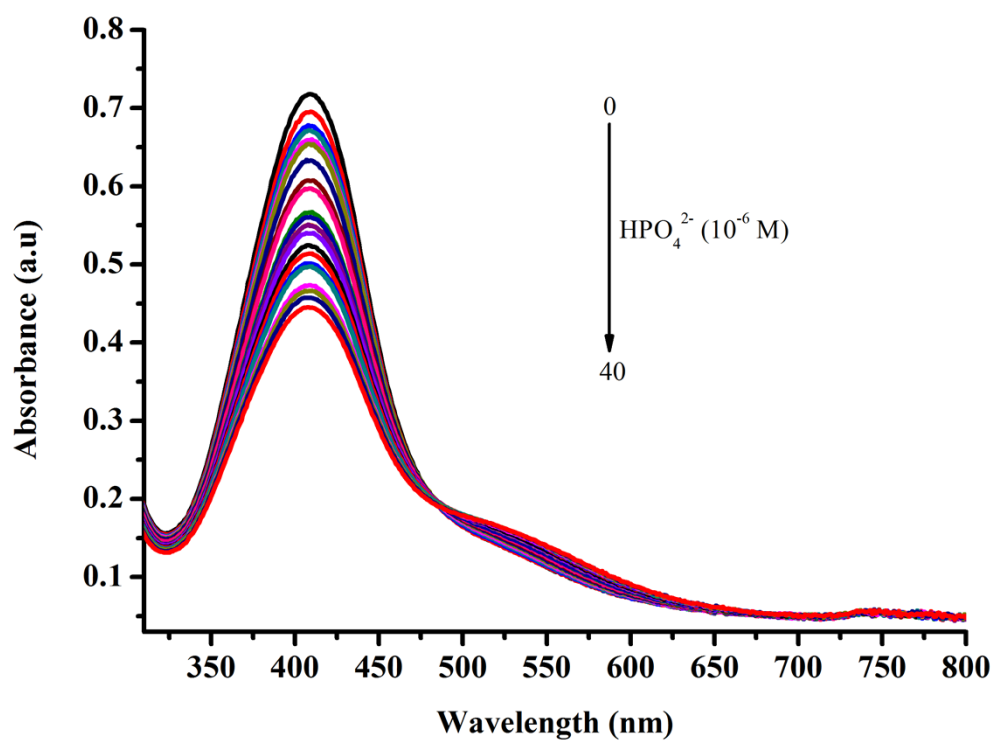

Fig. S3. Change of 1-AgNPs absorbance with  $\text{HPO}_4^{2-}$  concentration.

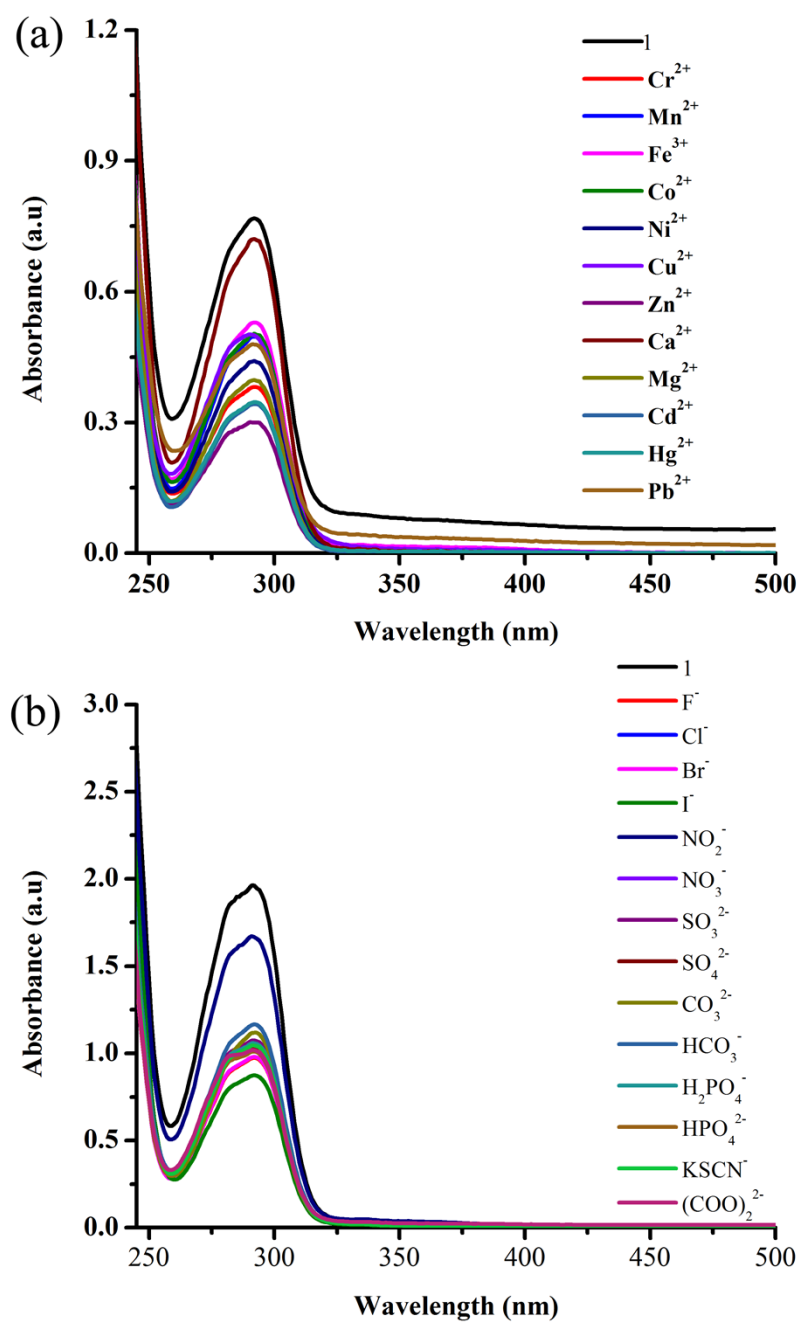

Fig. S4. Absorption spectra of 1 with different metal cations (a) and anions (b).
